# Supplementary material for: SARS-CoV-2 introductions and early dynamics of the epidemic in Portugal
Source: PubMed Central journal article supplement (PMC9053228; doi:10.1038/s43856-022-00072-0), 2022-01-28
Supplement: 43856_2022_72_MOESM2_ESM.pdf [file 43856_2022_72_MOESM2_ESM.pdf]

## Description of Additional Supplementary Files

**File Name:** Supplementary Data 1

**Description:** List of SARS-CoV-2 genome sequences (and respective Clade/lineage classification) from Portugal used in this study.

**File Name:** Supplementary Data 2

**Description:** Number of cumulative cases of COVID-19 by 31 March 2020, by country, and respective number of available SARS-CoV-2 genomes with collection date until 31 March (and available on GISAID as of 8 August 2020). Countries are shown by descending order of number of genomes and only countries with at least 30 COVID-19 reported cases and more than 2 genomes available are represented. Countries highlighted in bold are represented in Figure 1D.

**File Name:** Supplementary Data 3

**Description:** GISAID acknowledgment table for the background dataset. We acknowledge the original and submitting laboratories that generated the full-length viral genome sequences downloaded from GISAID (<https://www.gisaid.org/>) on August 6, 2020 with collection dates before April 1, 2020.

**File Name:** Supplementary Data 4

**Description:** Heatmap with relative number of transitions between countries of origin and different regions in Portugal

**File Name:** Supplementary Data 5

**Description:** Heatmap with relative number of infections generated by introductions from countries of origin and different regions in Portugal.

**File Name:** Supplementary Data 6

**Description:** Heatmap with relative number of transitions between countries of origin and different regions in Portugal for viruses belonging to Pango lineage A.

**File Name:** Supplementary Data 7

**Description:** Heatmap with relative number of transitions between countries of origin and different regions in Portugal for viruses belonging to Pango lineage B.

**File Name:** Supplementary Data 8

**Description:** Size, mean date estimates (and respective 95% highest posterior density intervals) of parent nodes of the MRCA and the earliest date of sample collection for each BEAST cluster.
